# Supplementary material for: ASC contributes to metastasis of oral cavity squamous cell carcinoma
Source: PubMed Central journal article supplement (PMC5226569; doi:10.18632/oncotarget.10317), 2016-06-29
Supplement: oncotarget-07-50074-s001.pdf [file oncotarget-07-50074-s001.pdf]

# ASC contributes to metastasis of oral cavity squamous cell carcinoma

## SUPPLEMENTARY MATERIALS AND METHODS

### Microarray analysis

Tumor samples of various sites in oral cavity including 48 OSCC (44 men and 4 women) and 14 adjacent normal clinical samples (diagnosed at the Chang

Gung Memorial Hospital, Tao-Yuan, Taiwan) were subjected to microarray analysis (Affymetrix Gene Chip HG-U133A). Demographic characteristics of Patients including age, gender, tumor sites, and tumor stages are listed in Supplementary Table S2.

## SUPPLEMENTARY FIGURES AND TABLES

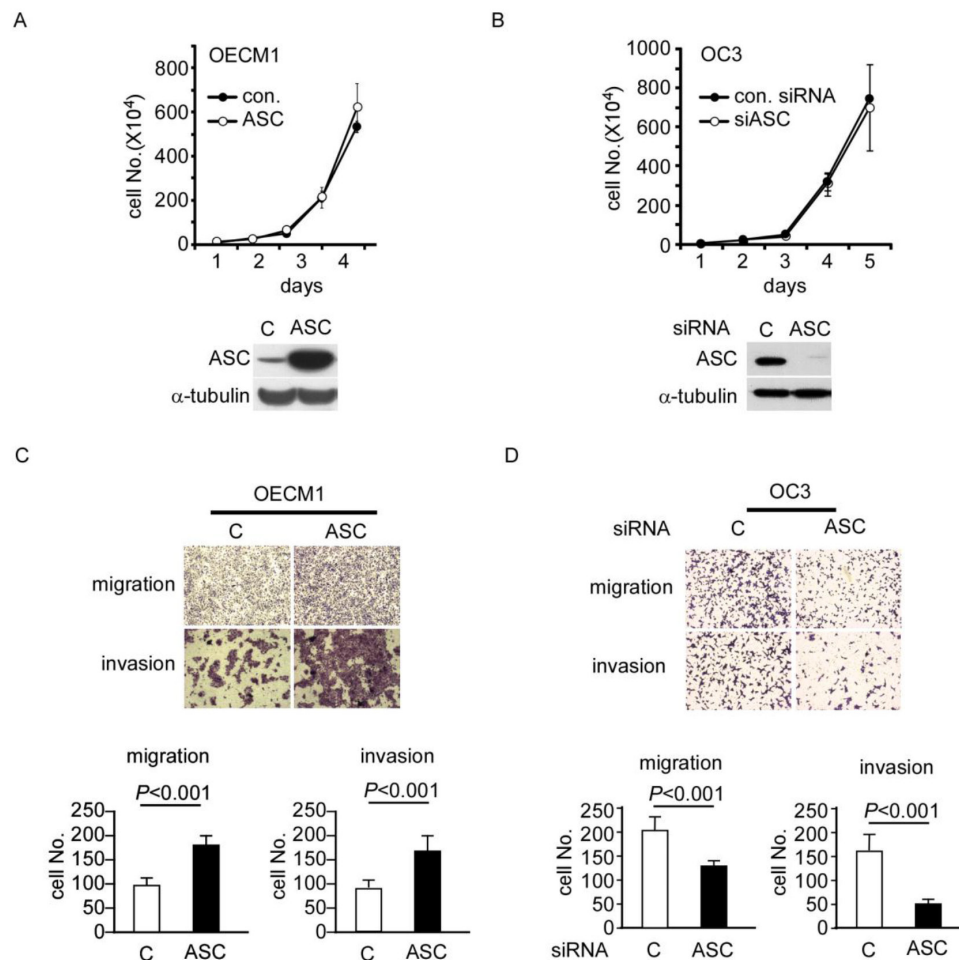

**Supplementary Figure S1: Tumor-related parameters in ASC-overexpressing OSCC cell lines.** **A.** OECM1 cells transiently expressing ASC or the vector (control) were monitored for cell proliferation over 4 days. **B.** OC3 cells with and without *asc*-specific siRNA-mediated knockdown were monitored for cell proliferation. Western blot analysis confirms the up- and down-regulations of ASC expression in the tested OECM1 and OC3 cells. **C.** OECM1 cells transiently expressing ASC or the vector (control) were assessed for migration (upper) and invasion (lower). Quantifications of migration and invasion are shown at the right. **D.** OC3 cells with and without siRNA-mediated knockdown of ASC were assessed for migration (upper) and invasion (lower). Quantifications of migration and invasion are shown at the right.

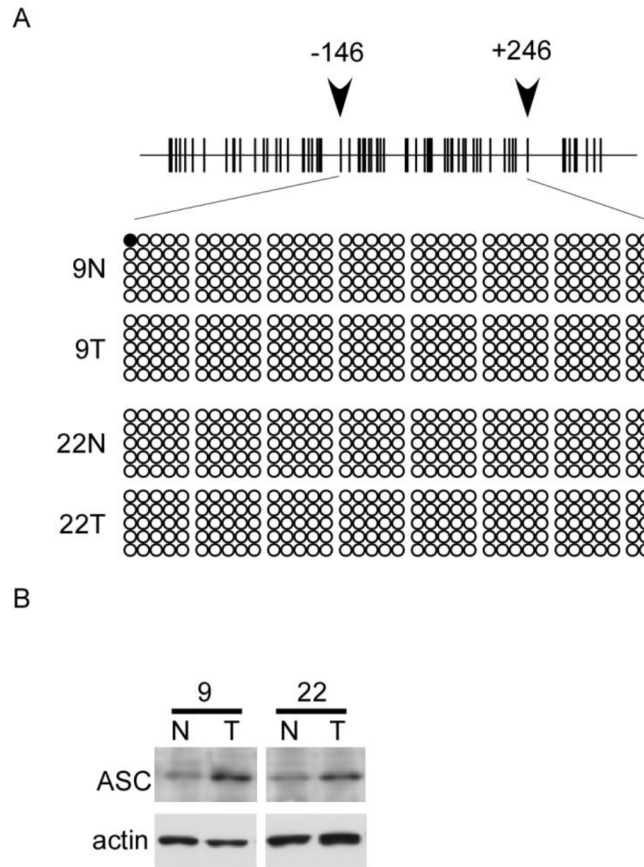

**Supplementary Figure S2: CpG island methylation in the promoter region of ASC.** **A.** Genomic DNA from paired tumor (T)/ normal (N) samples of two OSCC patients was analyzed for the methylation of 37 CpG sites in the *asc* gene promoter region (nts -146 to +246). Each circle represents one CpG site. **B.** Western blot analysis confirms the ASC were overexpression in tumor tissues (T) than in adjacent normal tissues (N).

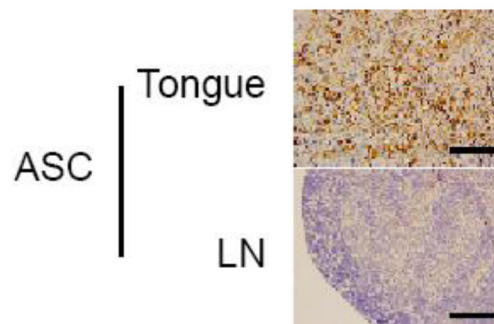

**Supplementary Figure S3: IHC results of subject No.14 mice in the animal study.** ASC were detected in tongue but weakly stained in lymph node region. Magnification, X200; bar, 100  $\mu$ m.

**Supplementary Table S1: Characteristics of 111 patients with OSCC**

| Characteristics   | Subjects number |
|-------------------|-----------------|
| Gender            |                 |
| Male              | 97              |
| Female            | 14              |
| Age (years)       |                 |
| mean±SD           | 50.0±11.8       |
| Tumor Location    |                 |
| Buccal            | 44              |
| Tongue            | 45              |
| Gingiva           | 9               |
| Mouth floor       | 5               |
| Lip               | 5               |
| Hard palate       | 3               |
| Overall TNM stage |                 |
| Stage I           | 13              |
| Stage II          | 29              |
| Stage III         | 14              |
| Stage IV          | 55              |
| Total             | 111             |

**Supplementary Table S2: Characteristics of 48 OSCC patients for microarray analysis**

| Characteristics   | Subjects number |
|-------------------|-----------------|
| Gender            |                 |
| Male              | 44              |
| Female            | 4               |
| Age (years)       |                 |
| mean±SD           | 51.3±9.7        |
| Tumor Location    |                 |
| Buccal            | 27              |
| Tongue            | 14              |
| Gum               | 5               |
| Uvula             | 2               |
| Overall TNM stage |                 |
| Stage I           | 1               |
| Stage II          | 15              |
| Stage III         | 5               |
| Stage IV B        | 5               |
| Stage IV A        | 22              |
| Total             | 48              |
